# Supplementary material for: Characterization of a Lytic Bacteriophage as an Antimicrobial Agent for Biocontrol of Shiga Toxin-Producing Escherichia coli O145 Strains
Source: Antibiotics (Basel). 2019 Jun 5;8(2):74. doi: 10.3390/antibiotics8020074 (PMC6627115; doi:10.3390/antibiotics8020074)
Supplement: Supplementary file 1 [file antibiotics-08-00074-s001.pdf]

## Supplementary Materials

**Table S1.** List of annotated ORFs with the size, location and predicted functions in the genome of Ro145clw.

| ORFs | Predicted Function <sup>a</sup>                                          | Functional Category <sup>b</sup> | Starting bp | Ending bp | Length of ORF (bp) | Direction |
|------|--------------------------------------------------------------------------|----------------------------------|-------------|-----------|--------------------|-----------|
| 1    | Major capsid protein CDS                                                 | Structural protein               | 299         | 1348      | 1050               | forward   |
| 2    | hypothetical protein CDS                                                 | n/a                              | 1408        | 1707      | 300                | forward   |
| 3    | Decoration protein CDS                                                   | Structural protein               | 1720        | 2070      | 351                | forward   |
| 4    | hypothetical protein CDS                                                 | n/a                              | 2107        | 2286      | 180                | forward   |
| 5    | hypothetical protein CDS                                                 | n/a                              | 2290        | 2802      | 513                | forward   |
| 6    | hypothetical protein CDS                                                 | n/a                              | 2805        | 3419      | 615                | forward   |
| 7    | hypothetical protein CDS                                                 | n/a                              | 3419        | 3778      | 360                | forward   |
| 8    | hypothetical protein CDS                                                 | n/a                              | 4173        | 4586      | 414                | forward   |
| 9    | Tail protein CDS                                                         | Structural protein               | 4589        | 5755      | 1167               | forward   |
| 10   | hypothetical protein CDS                                                 | n/a                              | 5781        | 6269      | 489                | reverse   |
| 11   | hypothetical protein CDS                                                 | n/a                              | 6313        | 6543      | 231                | reverse   |
| 12   | hypothetical protein CDS                                                 | n/a                              | 6557        | 7027      | 471                | reverse   |
| 13   | Putative calcineurin-like phosphoesterase superfamily domain protein CDS | DNA replication                  | 7024        | 8154      | 1131               | reverse   |
| 14   | hypothetical protein CDS                                                 | n/a                              | 8193        | 8384      | 192                | reverse   |
| 15   | hypothetical protein CDS                                                 | n/a                              | 8552        | 8971      | 420                | forward   |
| 16   | hypothetical protein CDS                                                 | n/a                              | 9070        | 9336      | 267                | forward   |
| 17   | Tape measure protein CDS                                                 | Structural protein               | 9329        | 11599     | 2271               | forward   |
| 18   | hypothetical protein CDS                                                 | n/a                              | 12094       | 12609     | 516                | forward   |
| 19   | hypothetical protein CDS                                                 | n/a                              | 12606       | 12971     | 366                | forward   |

|    |                                                      |                    |       |       |      |         |
|----|------------------------------------------------------|--------------------|-------|-------|------|---------|
| 20 | Putative tail assembly chaperone CDS                 | Structural protein | 12962 | 15517 | 2556 | forward |
| 21 | Putative tail fiber protein CDS                      | Structural protein | 15530 | 17620 | 2091 | forward |
| 22 | hypothetical protein CDS                             | n/a                | 17649 | 17789 | 141  | reverse |
| 23 | hypothetical protein CDS                             | n/a                | 17786 | 17974 | 189  | reverse |
| 24 | putative helicase CDS                                | DNA replication    | 17971 | 19395 | 1425 | reverse |
| 25 | hypothetical protein CDS                             | n/a                | 19648 | 19842 | 195  | reverse |
| 26 | hypothetical protein CDS                             | n/a                | 19842 | 20045 | 204  | reverse |
| 27 | hypothetical protein CDS                             | n/a                | 20078 | 20362 | 285  | reverse |
| 28 | hypothetical protein CDS                             | n/a                | 20362 | 20511 | 150  | reverse |
| 29 | hypothetical protein CDS                             | n/a                | 20594 | 20725 | 132  | reverse |
| 30 | Putative thermostable DNA polymerase I CDS           | DNA replication    | 20738 | 22915 | 2178 | reverse |
| 31 | hypothetical protein CDS                             | n/a                | 22974 | 23603 | 630  | reverse |
| 32 | hypothetical protein CDS                             | n/a                | 23690 | 23845 | 156  | reverse |
| 33 | Putative PD-(D/E)XK nuclease superfamily protein CDS | DNA replication    | 23842 | 25083 | 1242 | reverse |
| 34 | hypothetical protein CDS                             | n/a                | 25055 | 25351 | 297  | reverse |
| 35 | hypothetical protein CDS                             | n/a                | 25395 | 25895 | 501  | reverse |
| 36 | Transcriptional repressor DicA CDS                   | DNA replication    | 26021 | 26236 | 216  | forward |
| 37 | Putative helicase-primase CDS                        | DNA replication    | 26254 | 28494 | 2241 | reverse |
| 38 | hypothetical protein CDS                             | n/a                | 28553 | 28786 | 234  | reverse |
| 39 | hypothetical protein CDS                             | n/a                | 28783 | 28953 | 171  | reverse |
| 40 | hypothetical protein CDS                             | n/a                | 29448 | 29633 | 186  | forward |
| 41 | hypothetical protein CDS                             | n/a                | 29633 | 29887 | 255  | forward |

|    |                                  |                    |       |       |      |         |
|----|----------------------------------|--------------------|-------|-------|------|---------|
| 42 | hypothetical protein CDS         | n/a                | 30096 | 30305 | 210  | forward |
| 43 | hypothetical protein CDS         | n/a                | 30430 | 30606 | 177  | forward |
| 44 | hypothetical protein CDS         | n/a                | 30673 | 30822 | 150  | forward |
| 45 | hypothetical protein CDS         | n/a                | 30812 | 31081 | 270  | forward |
| 46 | hypothetical protein CDS         | n/a                | 31101 | 31211 | 111  | forward |
| 47 | hypothetical protein CDS         | n/a                | 31217 | 31579 | 363  | forward |
| 48 | hypothetical protein CDS         | n/a                | 31576 | 31779 | 204  | forward |
| 49 | hypothetical protein CDS         | n/a                | 31782 | 31964 | 183  | forward |
| 50 | hypothetical protein CDS         | n/a                | 31964 | 32257 | 294  | forward |
| 51 | Putative holin-like class II CDS | Cell lysis         | 32333 | 32641 | 309  | forward |
| 52 | Putative holin-like class I CDS  | Cell lysis         | 32634 | 32906 | 273  | forward |
| 53 | Endolysin CDS                    | Cell lysis         | 32884 | 33372 | 489  | forward |
| 54 | hypothetical protein CDS         | n/a                | 33628 | 33777 | 150  | forward |
| 55 | hypothetical protein CDS         | n/a                | 33774 | 33944 | 171  | forward |
| 56 | hypothetical protein CDS         | n/a                | 33941 | 34186 | 246  | forward |
| 57 | hypothetical protein CDS         | n/a                | 34218 | 34457 | 240  | forward |
| 58 | hypothetical protein CDS         | n/a                | 34992 | 35228 | 237  | forward |
| 59 | hypothetical protein CDS         | n/a                | 35225 | 35407 | 183  | forward |
| 60 | hypothetical protein CDS         | n/a                | 35627 | 36172 | 546  | forward |
| 61 | putative terminase CDS           | Packaging          | 36169 | 37419 | 1251 | forward |
| 62 | Putative structural protein CDS  | Structural protein | 37432 | 38907 | 1476 | forward |
| 63 | Putative head protein CDS        | Structural protein | 38904 | 39959 | 1056 | forward |
| 64 | Putative tail protein CDS        | Structural protein | 39959 | 40420 | 462  | forward |
| 65 | hypothetical protein CDS         | n/a                | 40449 | 40673 | 225  | reverse |
| 66 | putative spanin protein CDS      | Cell lysis         | 41048 | 41434 | 387  | forward |
| 67 | putative spanin protein CDS      | Cell lysis         | 41397 | 41543 | 147  | forward |

---

<sup>a</sup> CDS means coding sequence.

<sup>b</sup> n/a means the ORFs do not have any functional category.

**Table S2.** Storage evaluation of phage Ro145clw in 25% glycerol at -80°C for 5 months.

| Temperature | Before storage (Log PFU/ml)* | After storage (Log PFU/ml) <sup>α</sup> |
|-------------|------------------------------|-----------------------------------------|
| -80°C       | 10.43                        | 10.22                                   |

\* Phage titers were obtained prior to addition of glycerol for frozen storage.

<sup>α</sup> Phage titers were obtained right after thawing the phage solution.

**Table S3.** Comparison of the antimicrobial activities of phage Ro145clw (MOI of 100) against different EOP bacterial strains\* (initial concentration= 7 log CFU/ml) in LB broth at 25°C.

| Incubation time (h) | Bacterial reduction (Log CFU/ml) <sup>α</sup> |                         |
|---------------------|-----------------------------------------------|-------------------------|
|                     | <i>E. coli</i> O145:NM                        | <i>E. coli</i> O145:H28 |
| 0 h                 | 0.40 ± 0.13                                   | 0.27 ± 0.05             |
| 6 h                 | 6.20 ± 0.26                                   | 3.51 ± 0.30             |
| 24 h                | 1.65 ± 0.07                                   | 1.05 ± 0.16             |

\* Two strains, including *E. coli* O145:NM and *E. coli* O145:H28 (RM13514), were used; The *E. coli* O145:NM strain has EOP=1.05 and *E. coli* O145:H28 strain has EOP < 0.001.

<sup>α</sup> Reduction data are represented as means ± standard deviation and consist of three replicates compared to the bacterial population (log CFU/ml) recovered from untreated controls (no phages) at each time point.

**Table S4.** Bacterial strains, including *E. coli* and *Salmonella*, used in current study for either phage isolation or host range test of the isolated phage.

| Internal Ref.<br>No. | Strain                  | Source <sup>a</sup> | Serogroup | <i>eae</i> | <i>Stx1</i> | <i>Stx2</i> | Note <sup>b</sup> |
|----------------------|-------------------------|---------------------|-----------|------------|-------------|-------------|-------------------|
| RM17857              | <i>E. coli</i> O26:H18  | water               | 26        | -          | +           | -           |                   |
| RM18118              | <i>E. coli</i> O26      | water               | 26        | +          | +           | -           |                   |
| RM18132              | <i>E. coli</i> O26      | water               | 26        | +          | +           | -           | Host panel        |
| RM17133              | <i>E. coli</i> O26      | water               | 26        | -          | +           | -           | Host panel        |
| RM12551              | <i>E. coli</i> O103:H2  | water               | 103       | +          | +           | -           |                   |
| RM13322              | <i>E. coli</i> O103:H2  | cattle feces        | 103       | +          | +           | -           | Host panel        |
| RM8356               | <i>E. coli</i> O103     | water               | 103       | -          | -           | +           |                   |
| RM10744              | <i>E. coli</i> O103     | cattle feces        | 103       | +          | -           | +           | Host panel        |
| RM10046              | <i>E. coli</i> O121:H19 | cattle feces        | 121       | +          | -           | +           |                   |
| RM10068              | <i>E. coli</i> O121:H19 | trough<br>water     | 121       | +          | -           | +           |                   |
| RM8082               | <i>E. coli</i> O121     | cattle feces        | 121       | -          | +           | +           | Host panel        |
| RM12997              | <i>E. coli</i> O121     | pig feces           | 121       | -          | +           | -           | Host panel        |
| RM13483              | <i>E. coli</i> O111:H2  | cattle feces        | 111       | +          | +           | -           |                   |
| RM13789              | <i>E. coli</i> O111     | water               | 111       | +          | +           | -           |                   |
| RM11765              | <i>E. coli</i> O111     | water               | 111       | +          | +           | -           | Host panel        |
| RM14488              | <i>E. coli</i> O111     | water               | 111       | +          | -           | +           | Host panel        |
| RM8732               | <i>E. coli</i> O145     | water               | 145       | +          | +           | -           |                   |
| RM11691              | <i>E. coli</i> O145     | water               | 145       | +          | +           | -           |                   |
| RM12367              | <i>E. coli</i> O145     | water               | 145       | +          | -           | +           | Host panel        |
| RM10808              | <i>E. coli</i> O145     | cattle feces        | 145       | +          | +           | -           | Host panel        |
| RM9872               | <i>E. coli</i> O145:H28 | Cattle feces        | 145       | -          | -           | +           |                   |
| RM13514              | <i>E. coli</i> O145:H28 | Outbreak<br>strain  | 145       | +          | -           | +           |                   |
| RM13516              | <i>E. coli</i> O145:H28 | Outbreak<br>strain  | 145       | +          | -           | +           |                   |
| RM12761              | <i>E. coli</i> O145:H28 | Outbreak<br>strain  | 145       | +          | -           | +           |                   |

|              |                                                     |                 |      |   |   |   |            |
|--------------|-----------------------------------------------------|-----------------|------|---|---|---|------------|
| RM12581      | <i>E. coli</i> O145:H28                             | Outbreak strain | 145  | + | - | + |            |
| SJ23         | <i>E. coli</i> O145:NM                              | environment     | 145  | - | + | + |            |
| 94-0491      | <i>E. coli</i> O145:H-                              | environment     | 145  | - | + | + |            |
| RM10729      | <i>E. coli</i> O45                                  | cattle          | 45   | - | + | - | Host panel |
| RM13726      | <i>E. coli</i> O45                                  | cattle          | 45   | - | + | - |            |
| RM13745      | <i>E. coli</i> O45                                  | cattle          | 45   | - | + | - |            |
| RM13752      | <i>E. coli</i> O45                                  | cattle          | 45   | - | + | - | Host panel |
| RM18959      | <i>E. coli</i> O157:H7                              | water           | O157 | + | - | + | Host panel |
| RM18961      | <i>E. coli</i> O157:H7                              | water           | O157 | + | - | + |            |
| RM18972      | <i>E. coli</i> O157:H7                              | water           | O157 | + | + | + |            |
| RM18974      | <i>E. coli</i> O157:H7                              | water           | O157 | + | - | + | Host panel |
| DH5 $\alpha$ | Generic <i>E. coli</i>                              |                 |      |   |   |   | Host panel |
| ATCC 13706   | Generic <i>E. coli</i>                              |                 |      |   |   |   | Host panel |
| ATCC 43888   | <i>E. coli</i> O157:H7<br>(without <i>stx</i> gene) |                 | O157 |   |   |   | Host panel |
| n/a          | <i>Salmonella</i> Montevideo 51                     |                 |      |   |   |   |            |
| n/a          | <i>Salmonella</i> Newport H1073                     |                 |      |   |   |   |            |
| n/a          | <i>Salmonella</i> Heidelberg<br>45955               |                 |      |   |   |   |            |
| n/a          | <i>Salmonella</i> Enteritidis PT30                  |                 |      |   |   |   |            |
| n/a          | <i>Salmonella</i> Typhimurium<br>14028              |                 |      |   |   |   |            |

<sup>a</sup> The source is the type of environmental samples where the strain was originally isolated from.

<sup>b</sup> Host panel means the strains were used for the enrichment of the environmental samples for phage isolation.

“-” is the negative and “+” is positive of the PCR results.

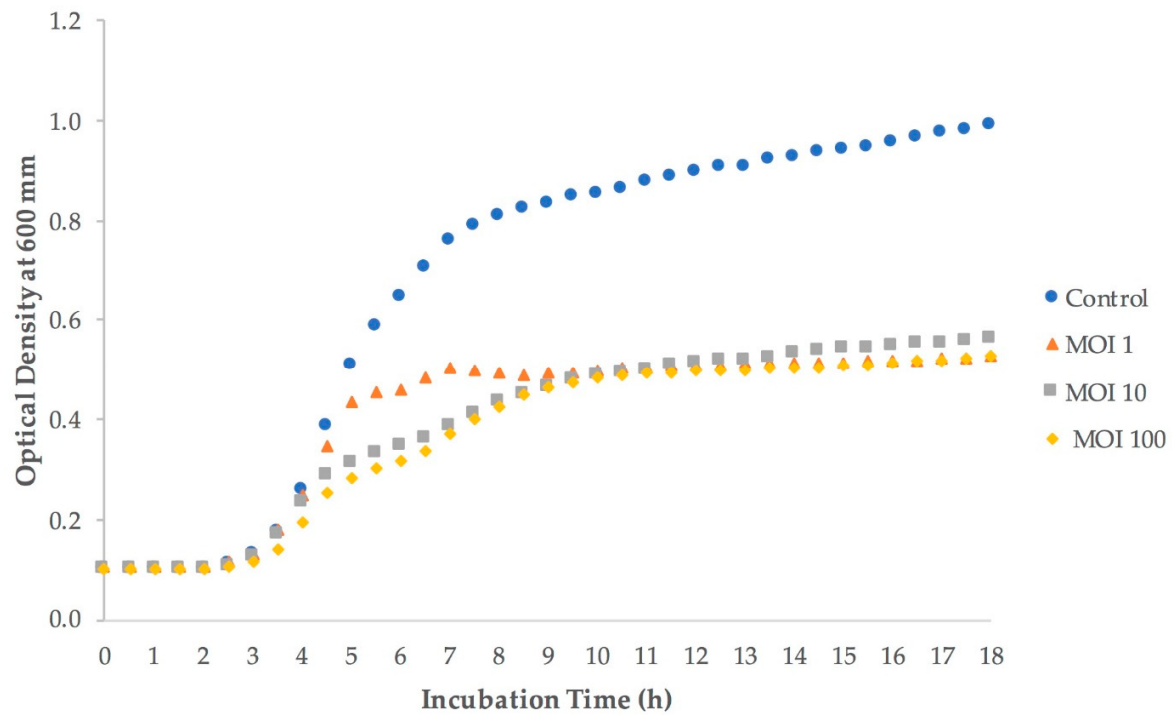

**Figure S1.** Bacterial challenge assay of the *E. coli* O145:H28 strain (RM13514) treated with phage Ro145clw in 96-well plate. The OD<sub>600</sub> was measured by spectrophotometer every 0.5 h for the period of 18-h incubation at 37°C. The control (circles) contains only bacterial culture. MOI 1 (triangles) contains bacterial culture treated with the equal concentration of phage Ro145clw; MOI 10 (squares) contains bacterial culture treated with 10-fold more concentration of the phage; MOI 100 (diamonds) contains bacterial culture treated with 100-fold more concentration of the phage.
